# Supplementary material
Source: PubMed Central journal article supplement (PMC8748291)
Supplement: NIHMS1750108-supplement-1.pdf [file NIHMS1750108-supplement-1.pdf]

Appendix Exhibit 1. Experimental Stimuli

*Condition 1: Sugary drink discouragement*

Once upon a time there was a little otter named **Potter**.

**Potter** didn't drink sugary drinks like soda, juice, or punch.

Mama and Papa Otter would say, "**Potter**, don't drink sugary drinks at breakfast, dinner, or lunch!"

Say no to sugary drinks, and you should know, fewer sugary drinks will help you grow!



**Potter** doesn't like sugary drinks, this is true. He wants his friends to drink fewer sugary drinks, too!

"Let's go on a picnic," he said one day. "We can teach my friends why sugary drinks aren't healthy along the way!"



First, they spotted **Toada**, who was drinking a soda.

"Whoa **Toada**, why do you have a frown? Drink less soda and turn that frown upside down! That soda has a lot of sugar that your teeth don't need! Drinking fewer sugary drinks is best for you indeed!"



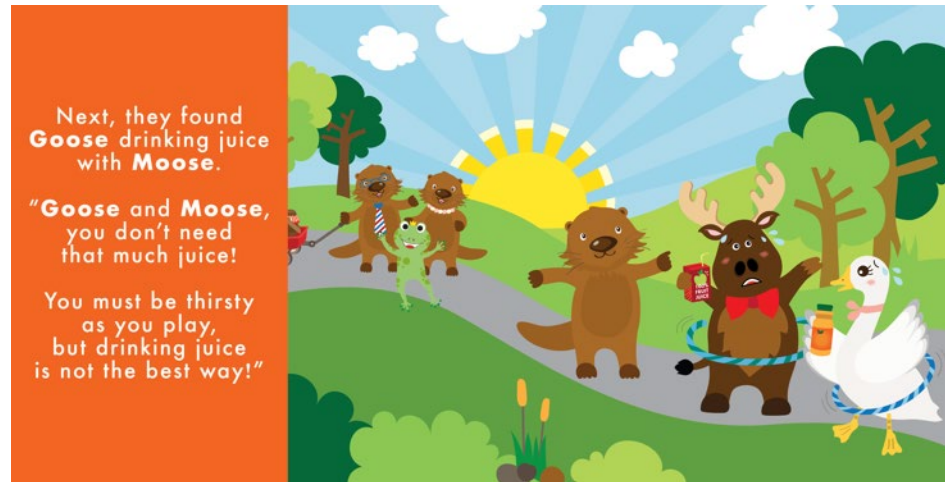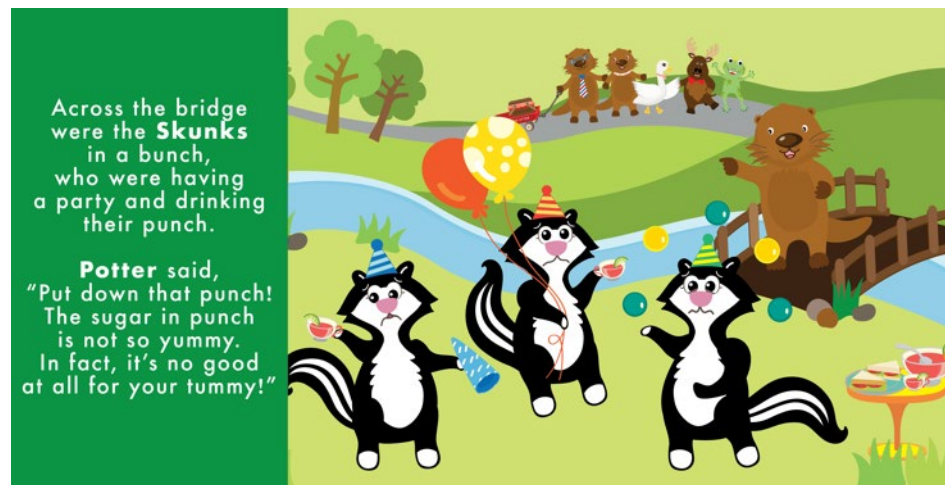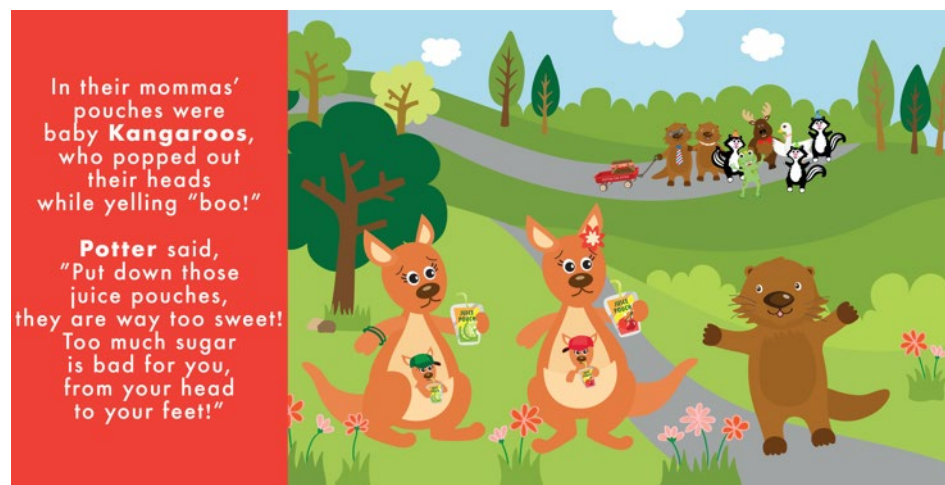

Appendix  
Storybooks About Healthy Beverage Consumption: Effects in an Online Randomized Experiment With Parents  
Grummon et al.

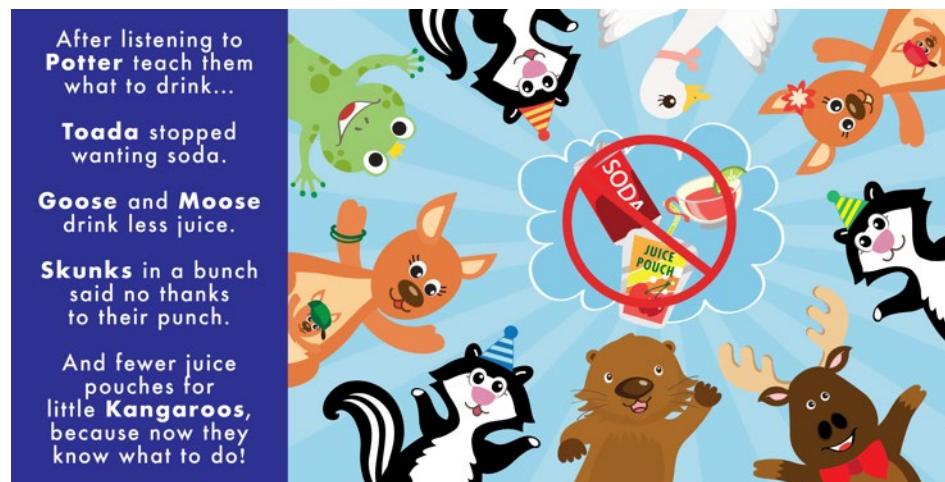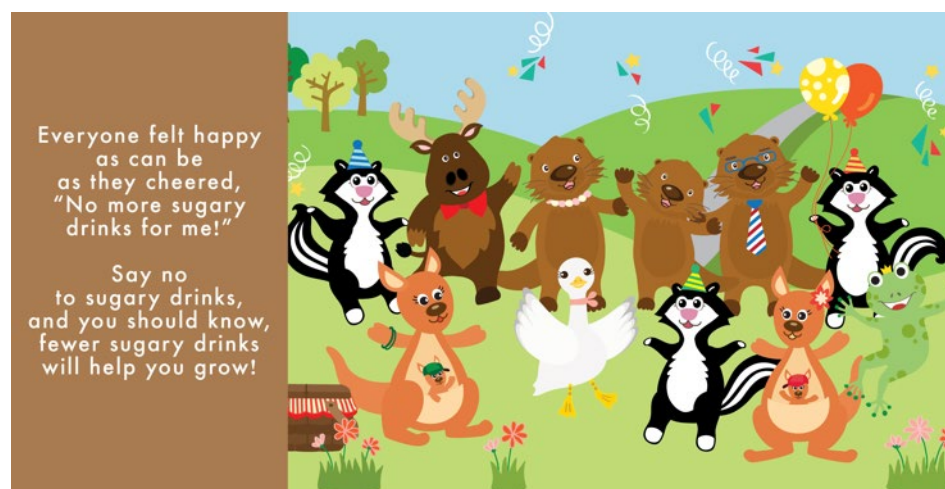



*Condition 2: Water encouragement*

Once upon a time there was a little otter named **Potter**.

**Potter** loved to drink water.

Mama and Papa Otter would say, "**Potter**, drink water every day!"

Drink water for thirst, and you should know, water is healthy, it helps you grow!

An illustration of three cartoon otters sitting at a table. The otter on the left is wearing glasses and a striped tie, holding a glass of water. The otter in the middle is holding a glass of water. The otter on the right is holding a glass of water. There are water bottles on the table. The background is yellow with stylized clouds.

**Potter** loves water, this is true. He wants his friends to love water, too!

"Let's go on a picnic," he said one day. "We can teach my friends good things about water along the way!"

An illustration of three cartoon otters standing in a grassy area in front of a brown house with a red door and a white picket fence. One otter is pulling a red wagon labeled "POTTER THE OTTER" filled with picnic supplies. The other two otters are holding glasses of water. The background shows green hills and a blue sky with white clouds.

First, they spotted **Toada**, who had a frown.

"Whoa **Toada**, why do you have a frown? Have some water and turn that frown upside down! Water keeps your teeth clean, it's what you need! Drinking more water is best for you indeed!"

An illustration of three cartoon otters standing on a path next to a pond. One otter is pulling a red wagon labeled "POTTER THE OTTER" filled with picnic supplies. The other two otters are holding glasses of water. In the pond, a green frog with a sad expression is sitting on a lily pad. The background shows green hills and a blue sky with white clouds.

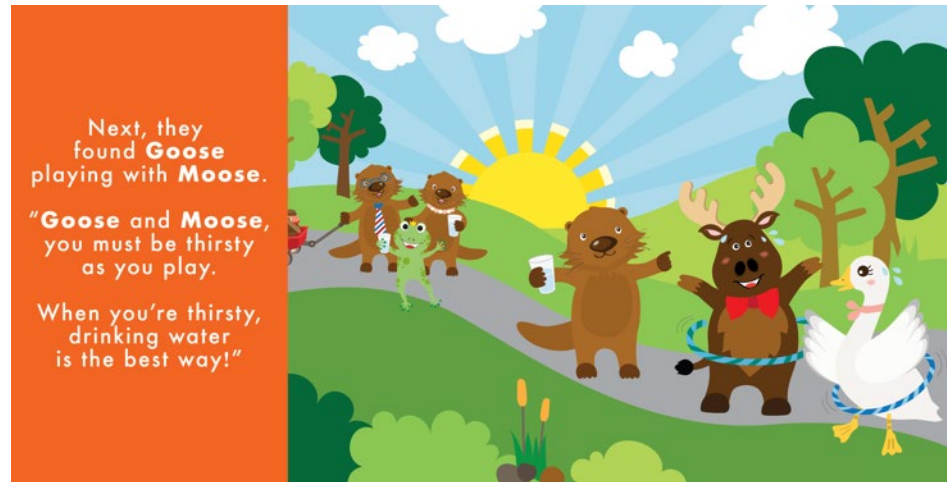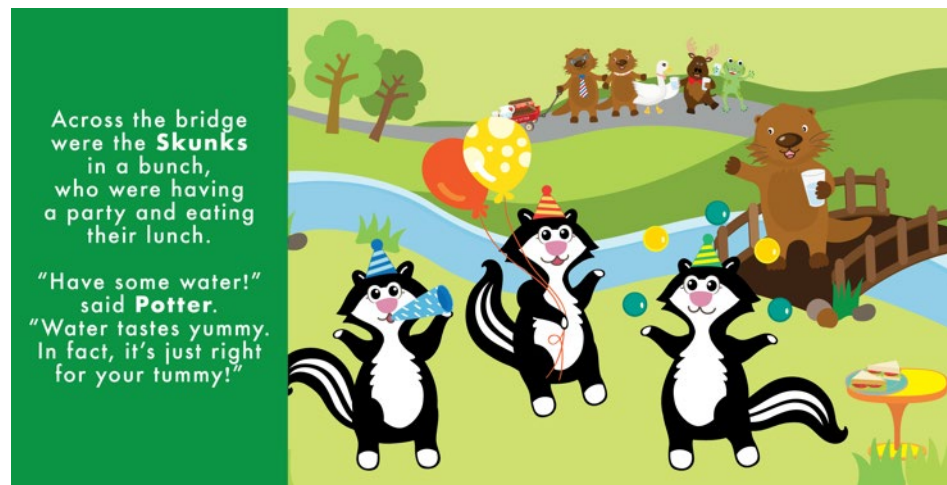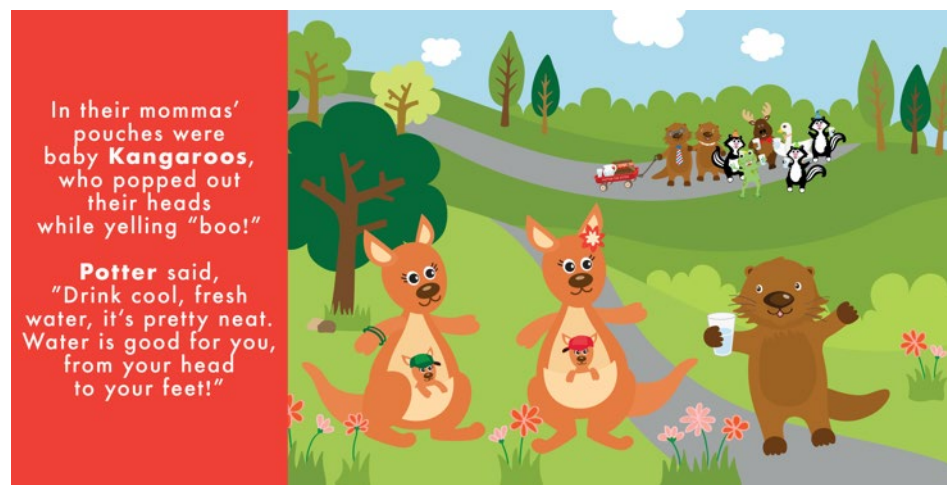

Appendix

Storybooks About Healthy Beverage Consumption: Effects in an Online Randomized Experiment With Parents  
Grummon et al.

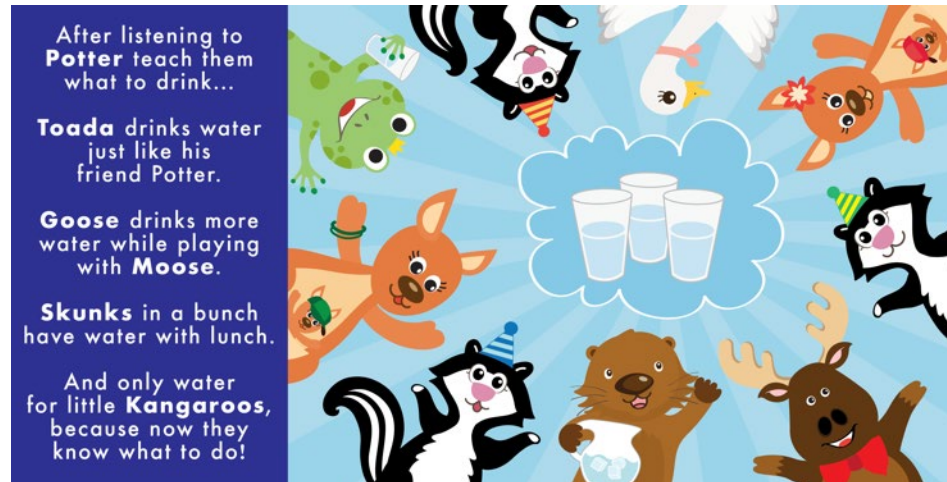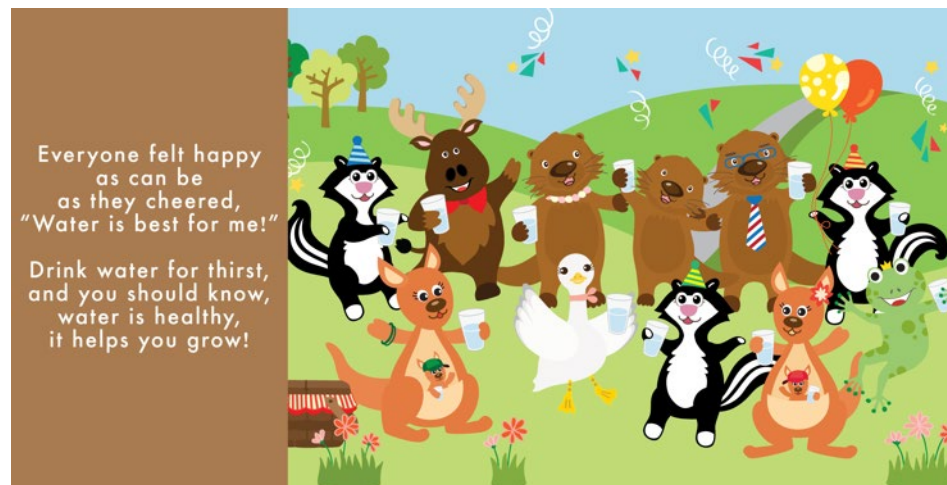

***Condition 3: Alternating discouragement and encouragement messages***

Condition 3 showed participants a random selection of pages from Conditions 1 and 2 (see above). We maintained appropriate ordering of the pages: the first page participants viewed was either the first page from Condition 1 or the first page from Condition 2 with equal probability; the second page was either the second page from Condition 1 or the second page from Condition 2 with equal probability, and so on.



**Condition 4: Integrated discouragement and encouragement messages (Original book)**

Note: Condition 4 presented 8 pages from the original *Potter the Otter: A Tale About Water* book. We made minor modifications to the presentation of the book to ensure optimal viewing experience in the context of an online survey (e.g., increasing font size and color contrasts as needed).

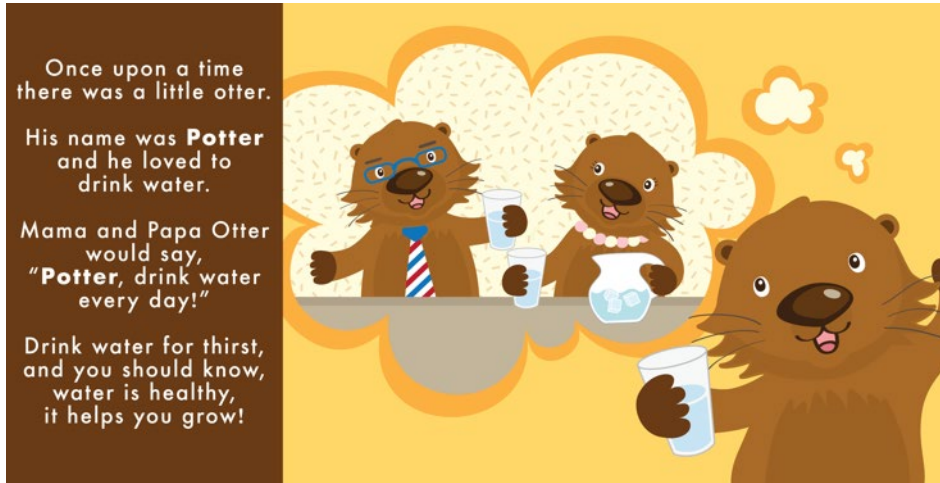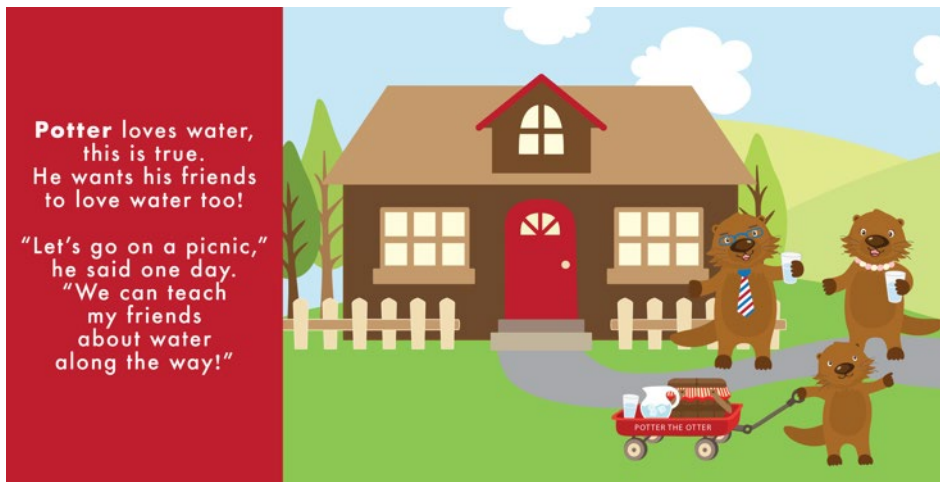



Appendix  
Storybooks About Healthy Beverage Consumption: Effects in an Online Randomized Experiment With Parents  
Grummon et al.

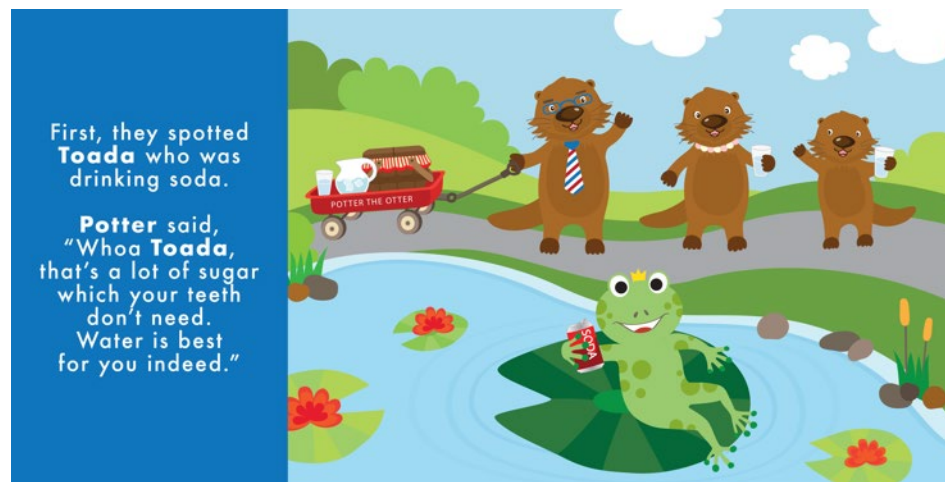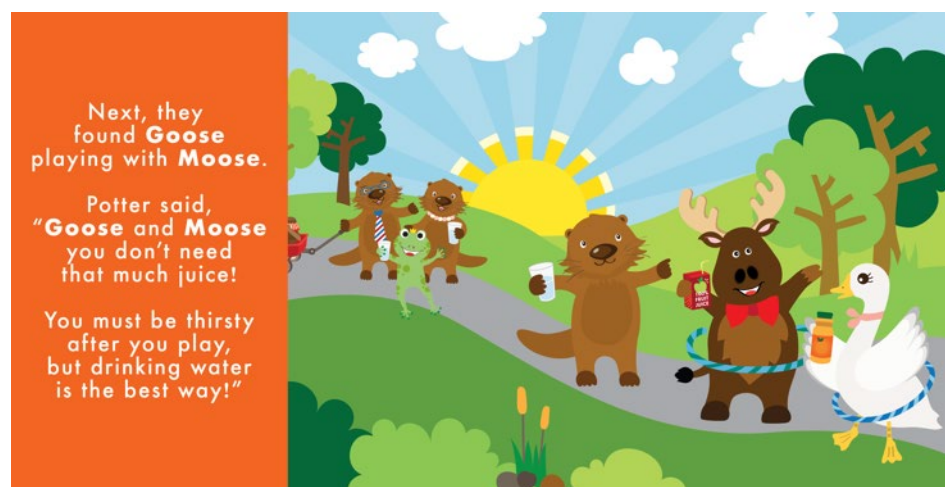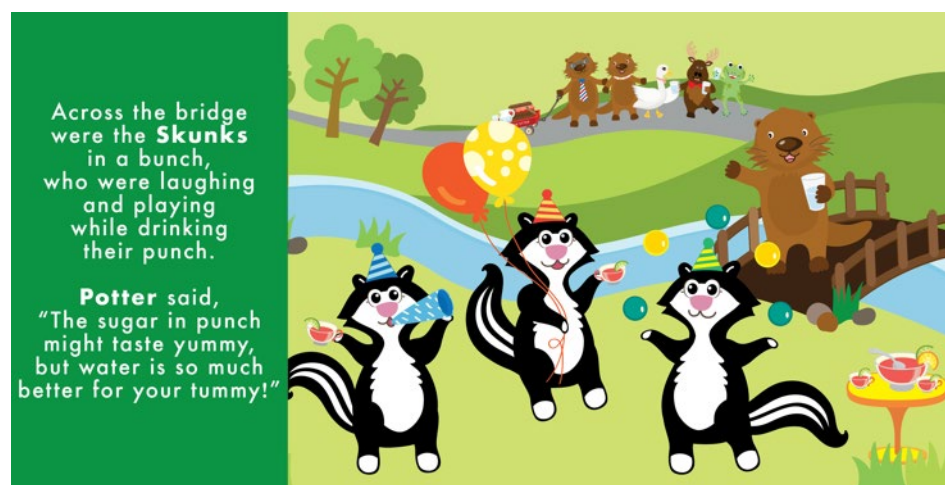

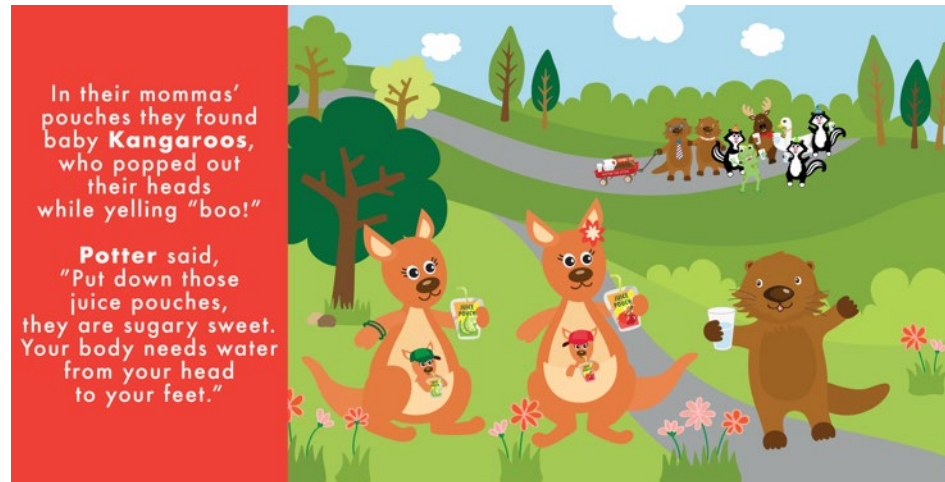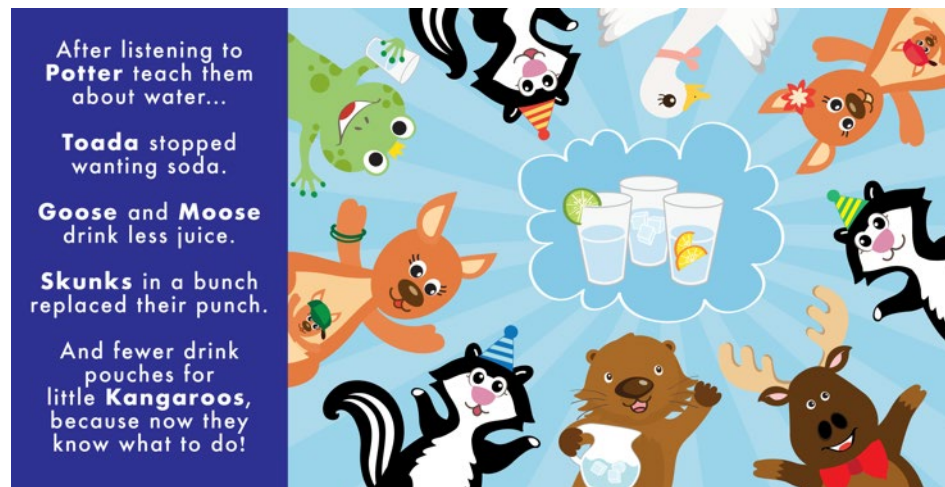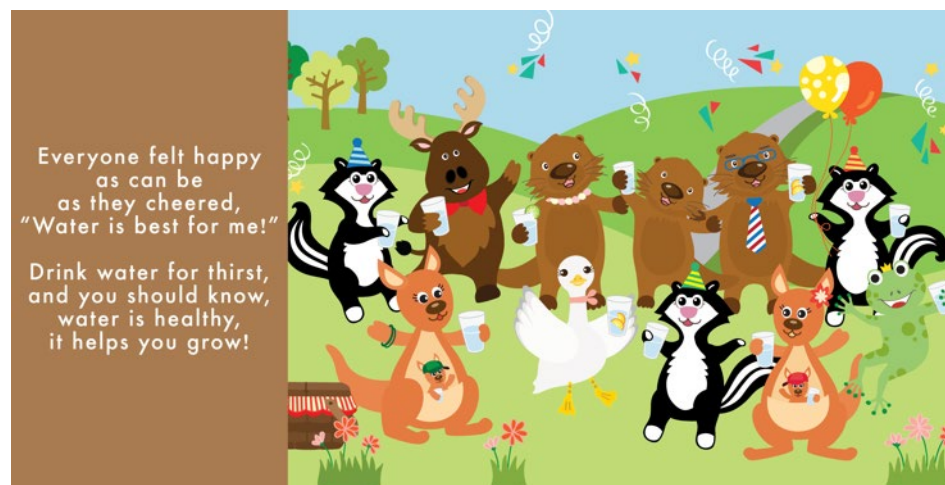

*Condition 5: Control messages about school readiness*

**Potter** and friends are turning five. Time to get ready for school!

But before they start Kindergarten, there's a lot to do.



In January, **Potter's** parents call the school to find out how to enroll **Potter** in Kindergarten and start preparing for school now.

It's time for Kindergarten—hooray! Let's have fun as we learn and play.

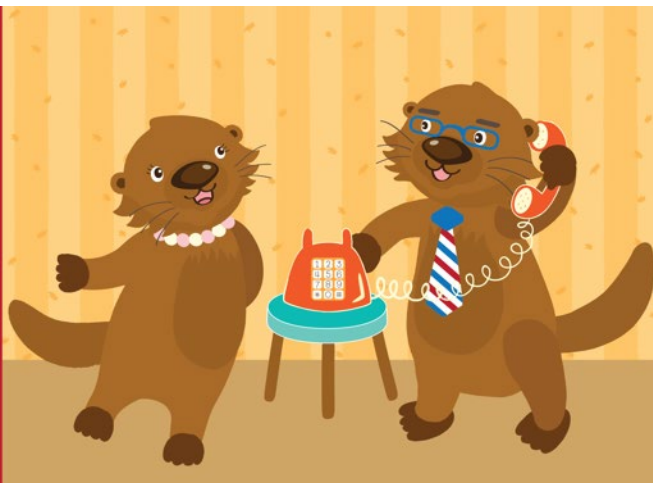

**Moose** gets his vision checked to see if glasses are something he needs. He has to be able to see clearly so he can learn well and read!

It's time for Kindergarten—hooray! Let's have fun as we learn and play.





In May, **Goose** is excited to go to Meet the Teacher night. She finds her new classroom so she can start the school year off right.

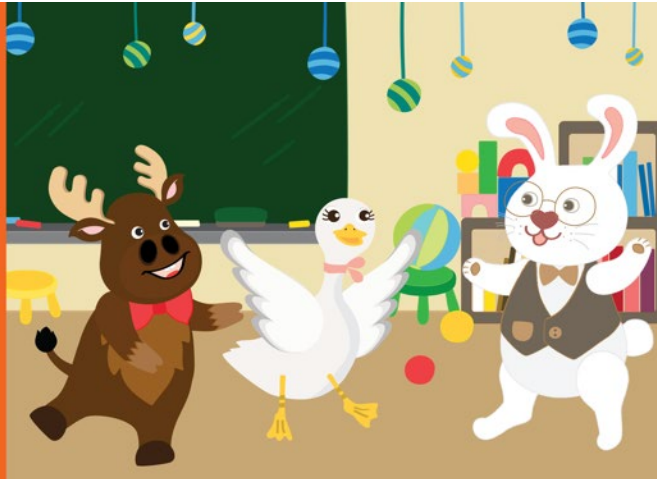

The **Skunks** prepare for school by putting together puzzles.

They see how the pieces fit together and talk about shapes and colors.

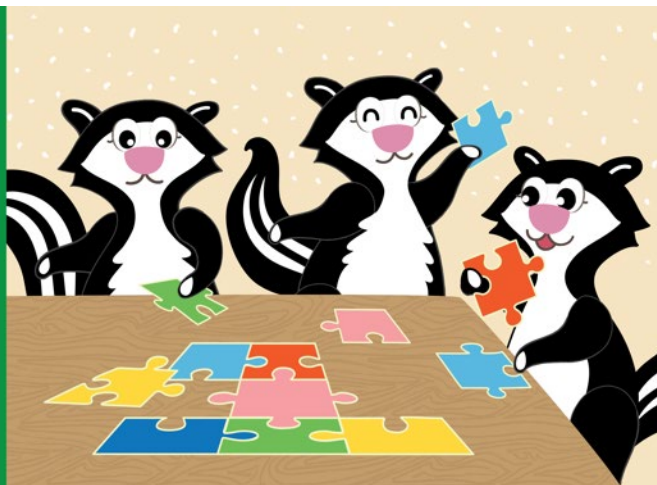

**Kangas** teach the little **Roos** how to count from one to ten.

They also learn their ABCs, then say them over again!

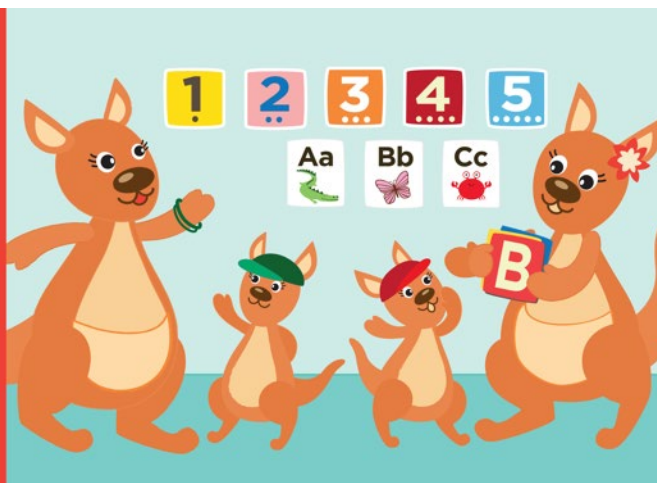





**Appendix**  
**Storybooks About Healthy Beverage Consumption: Effects in an Online Randomized Experiment With Parents**  
**Grummon et al.**

**Appendix Exhibit 2.** Survey measures.

| Construct             | Item                                                                                                                                                                                                                                                                                                                                                                                                                                                                                                                                                                                                                                                                                                                                                                                                                                                                                  | Response scale                                                                                                    | Source |
|-----------------------|---------------------------------------------------------------------------------------------------------------------------------------------------------------------------------------------------------------------------------------------------------------------------------------------------------------------------------------------------------------------------------------------------------------------------------------------------------------------------------------------------------------------------------------------------------------------------------------------------------------------------------------------------------------------------------------------------------------------------------------------------------------------------------------------------------------------------------------------------------------------------------------|-------------------------------------------------------------------------------------------------------------------|--------|
| Prompt                | <p><b>Introduction</b></p> <p>This survey will show you pages of a children’s book and ask you some questions.</p> <p>Your feedback is important to us, and there are no right or wrong answers.</p> <p>Please read each question carefully. You will not be able to change your answers after you advance to the next page.</p> <p>Throughout the survey, we will ask you questions about your child. We are interested in children 6 months to 5 years old. Please think about your child in this age range. If you have more than one child in this age range, think of the child in this age range <u>who had the most recent birthday</u>.</p> <p>Write this child’s initials in the box here.</p> <p>Whenever we ask you a question about “your child,” we want you to think about this child who is between 6 months and 5 years old and who had the most recent birthday.</p> | Text                                                                                                              |        |
| Age of focal child    | How old is this child?                                                                                                                                                                                                                                                                                                                                                                                                                                                                                                                                                                                                                                                                                                                                                                                                                                                                | 0= 6-11 months old<br>1= 12-23 months old<br>2= 2 years old<br>3= 3 years old<br>4= 4 years old<br>5= 5 years old |        |
| Gender of focal child | What is this child’s gender?                                                                                                                                                                                                                                                                                                                                                                                                                                                                                                                                                                                                                                                                                                                                                                                                                                                          | 1=Boy<br>2=Girl<br>3=Transgender<br>4=Nonbinary                                                                   |        |

**Appendix**  
**Storybooks About Healthy Beverage Consumption: Effects in an Online Randomized Experiment With Parents**  
**Grummon et al.**

|                                |                                                                                                                                      |                                                                                                                                                                                          |                                              |
|--------------------------------|--------------------------------------------------------------------------------------------------------------------------------------|------------------------------------------------------------------------------------------------------------------------------------------------------------------------------------------|----------------------------------------------|
|                                |                                                                                                                                      | 5=Another option not listed: [Text box]                                                                                                                                                  |                                              |
| Frequency of serving beverages | In the past 30 days, how often did you serve this child...                                                                           |                                                                                                                                                                                          | Adapted from the BEVQ-PS (Lora et al., 2016) |
|                                | Soda or soft drinks (non-diet)                                                                                                       | 0= Never or less than 1 time per week<br>1= 1 time per week<br>2= 2-3 times per week<br>5= 4-6 times per week<br>7= 1 time per day<br>14= 2 times per day<br>21= 3 or more times per day |                                              |
|                                | Juice or juice pouches                                                                                                               | 0= Never or less than 1 time per week<br>1= 1 time per week<br>2= 2-3 times per week<br>5= 4-6 times per week<br>7= 1 time per day<br>14= 2 times per day<br>21= 3 or more times per day |                                              |
|                                | Punch and other fruit-flavored drinks (not 100% juice)                                                                               | 0= Never or less than 1 time per week<br>1= 1 time per week<br>2= 2-3 times per week<br>5= 4-6 times per week<br>7= 1 time per day<br>14= 2 times per day<br>21= 3 or more times per day |                                              |
|                                | Plain (unflavored) water, including tap and bottled water                                                                            | 0= Never or less than 1 time per week<br>1= 1 time per week<br>2= 2-3 times per week<br>5= 4-6 times per week<br>7= 1 time per day<br>14= 2 times per day<br>21= 3 or more times per day |                                              |
|                                | Next, we will show you several pages of a children's book about a character named Potter the Otter. <b>Please read each page out</b> |                                                                                                                                                                                          |                                              |

**Appendix**  
**Storybooks About Healthy Beverage Consumption: Effects in an Online Randomized Experiment With Parents**  
**Grummon et al.**

|                                        |                                                                                                                                                                                                                                                                                                                                                                                                                                                                                                                                                                                                                                                                                                                          |                                                                                                                    |                                                               |
|----------------------------------------|--------------------------------------------------------------------------------------------------------------------------------------------------------------------------------------------------------------------------------------------------------------------------------------------------------------------------------------------------------------------------------------------------------------------------------------------------------------------------------------------------------------------------------------------------------------------------------------------------------------------------------------------------------------------------------------------------------------------------|--------------------------------------------------------------------------------------------------------------------|---------------------------------------------------------------|
|                                        | <p><b>loud to yourself.</b> When you read, imagine you are reading to your child with initials [initials].</p> <p>Take your time and read slowly. Then, we will ask you some questions about the pages.</p>                                                                                                                                                                                                                                                                                                                                                                                                                                                                                                              |                                                                                                                    |                                                               |
| <b>Between Subject Experiment</b>      |                                                                                                                                                                                                                                                                                                                                                                                                                                                                                                                                                                                                                                                                                                                          |                                                                                                                    |                                                               |
| Experimental stimuli                   | <p>[Randomize participants to one of 5 conditions:<br/>           1: Original pages from <i>Potter the Otter: A Tale About Water</i><br/>           2: Encouragement only: modified pages from <i>Potter The Otter: A Tale About Water</i> that focus on encouraging water only<br/>           3: Discouragement only: modified pages from <i>Potter The Otter: A Tale About Water</i> that focus on discouraging sugary drinks only<br/>           4: Encouragement + discouragement: Random sample of pages from conditions 2 and 3<br/>           5: Control: pages from <i>Potter Gets Ready for Kindergarten</i><br/>           ***See Exhibit 1 for stimuli</p> <p>Display images for participant's condition]</p> |                                                                                                                    |                                                               |
| <b>Perceived message effectiveness</b> |                                                                                                                                                                                                                                                                                                                                                                                                                                                                                                                                                                                                                                                                                                                          |                                                                                                                    |                                                               |
| Prompt                                 | Thinking about the pages of the children's book you just read, say how much you agree or disagree with these statements.                                                                                                                                                                                                                                                                                                                                                                                                                                                                                                                                                                                                 |                                                                                                                    |                                                               |
| Perceived encouragement                | The messages in the book made serving my child water seem appealing to me.                                                                                                                                                                                                                                                                                                                                                                                                                                                                                                                                                                                                                                               | 1=Strongly disagree<br>2=Somewhat disagree<br>3=Neither agree nor disagree<br>4=Somewhat agree<br>5=Strongly agree | Adapted from (Baig et al., 2019; Grummon, Hall, et al., 2019) |
|                                        | The messages in the book made me feel sure about the health effects of my child drinking water.                                                                                                                                                                                                                                                                                                                                                                                                                                                                                                                                                                                                                          | 1=Strongly disagree<br>2=Somewhat disagree<br>3=Neither agree nor disagree                                         | Adapted from (Baig et al., 2019; Grummon,                     |



**Appendix**  
**Storybooks About Healthy Beverage Consumption: Effects in an Online Randomized Experiment With Parents**  
**Grummon et al.**

|                                 |                                                                                                                                                                                                        |                                                                                                                    |                                                               |
|---------------------------------|--------------------------------------------------------------------------------------------------------------------------------------------------------------------------------------------------------|--------------------------------------------------------------------------------------------------------------------|---------------------------------------------------------------|
|                                 |                                                                                                                                                                                                        | 4=Somewhat agree<br>5=Strongly agree                                                                               | Hall, et al.,<br>2019)                                        |
|                                 | The messages in the book made me want to serve my child water.                                                                                                                                         | 1=Strongly disagree<br>2=Somewhat disagree<br>3=Neither agree nor disagree<br>4=Somewhat agree<br>5=Strongly agree | Adapted from (Baig et al., 2019; Grummon, Hall, et al., 2019) |
| Perceived encouragement -child  | Imagine you read this book out loud to your child with initials [initials]. How much would the messages in the book make this child want to drink water?                                               | 1=Not at all<br>2=A little bit<br>3=Somewhat<br>4=Quite a bit<br>5=Very much                                       | Newly developed                                               |
| Prompt                          | Say how much you agree or disagree with these statements.                                                                                                                                              | 1=Strongly disagree<br>2=Somewhat disagree<br>3=Neither agree nor disagree<br>4=Somewhat agree<br>5=Strongly agree |                                                               |
| Perceived discouragement        | The messages in the book made serving my child soda, juice, juice pouches, or punch seem less appealing to me.                                                                                         | 1=Strongly disagree<br>2=Somewhat disagree<br>3=Neither agree nor disagree<br>4=Somewhat agree<br>5=Strongly agree | Adapted from (Baig et al., 2019; Grummon, Hall, et al., 2019) |
|                                 | The messages in the book made me concerned about the health effects of my child drinking soda, juice, juice pouches, or punch.                                                                         | 1=Strongly disagree<br>2=Somewhat disagree<br>3=Neither agree nor disagree<br>4=Somewhat agree<br>5=Strongly agree | Adapted from (Baig et al., 2019; Grummon, Hall, et al., 2019) |
|                                 | The messages in the book discouraged me from wanting to serve my child soda, juice, juice pouches, or punch.                                                                                           | 1=Strongly disagree<br>2=Somewhat disagree<br>3=Neither agree nor disagree<br>4=Somewhat agree<br>5=Strongly agree | Adapted from (Baig et al., 2019; Grummon, Hall, et al., 2019) |
| Perceived discouragement -child | Imagine you read this book out loud to your child with initials [initials]. How much would the messages in the book discourage this child from wanting to drink soda, juice, juice pouches, and punch? | 1=Not at all<br>2=A little bit<br>3=Somewhat<br>4=Quite a bit<br>5=Very much                                       | Newly developed                                               |
| <b>Affect and Elaboration</b>   |                                                                                                                                                                                                        |                                                                                                                    |                                                               |

**Appendix**  
**Storybooks About Healthy Beverage Consumption: Effects in an Online Randomized Experiment With Parents**  
**Grummon et al.**

|                                                                  |                                                                                                        |                                                                              |                                                                                                                |
|------------------------------------------------------------------|--------------------------------------------------------------------------------------------------------|------------------------------------------------------------------------------|----------------------------------------------------------------------------------------------------------------|
| Affect                                                           | How much did the messages in the book make you feel...                                                 |                                                                              | (Brewer et al., 2019; Grummon, Taillie, et al., 2019) (negative emotions); newly developed (positive emotions) |
|                                                                  | Worried?                                                                                               | 1=Not at all<br>2=A little bit<br>3=Somewhat<br>4=Quite a bit<br>5=Very much |                                                                                                                |
|                                                                  | Guilty?                                                                                                | 1=Not at all<br>2=A little bit<br>3=Somewhat<br>4=Quite a bit<br>5=Very much |                                                                                                                |
|                                                                  | Happy?                                                                                                 | 1=Not at all<br>2=A little bit<br>3=Somewhat<br>4=Quite a bit<br>5=Very much |                                                                                                                |
|                                                                  | Reassured?                                                                                             | 1=Not at all<br>2=A little bit<br>3=Somewhat<br>4=Quite a bit<br>5=Very much |                                                                                                                |
| Thinking about beverages' health effects                         | The messages in the book made me think about the health effects of the beverages that my child drinks. | 1=Not at all<br>2=A little bit<br>3=Some<br>4=Quite a bit<br>5=Very much     | Adapted from (Fathelrahman et al., 2010; Grummon, Taillie, et al., 2019; Hammond et al., 2003)                 |
| <b>Credibility, Understandability &amp; General Satisfaction</b> |                                                                                                        |                                                                              |                                                                                                                |
| Previous experience with Potter                                  | The next questions are also about the pages of the children's book you read                            | 0=No<br>1=Yes                                                                | Newly developed                                                                                                |
|                                                                  | Had you ever read this book before today?                                                              |                                                                              |                                                                                                                |

**Appendix**  
**Storybooks About Healthy Beverage Consumption: Effects in an Online Randomized Experiment With Parents**  
**Grummon et al.**

|                               |                                                                                                                                                                |                                                                                                                                                     |                                    |
|-------------------------------|----------------------------------------------------------------------------------------------------------------------------------------------------------------|-----------------------------------------------------------------------------------------------------------------------------------------------------|------------------------------------|
| Overall liking-images         | Overall, how much did you like <u>the images</u> in the book?                                                                                                  | 1=Not at all<br>2=A little bit<br>3=Some<br>4=Quite a bit<br>5=Very much                                                                            | Newly developed                    |
|                               | Overall, how much did you like <u>the messages</u> in the book?                                                                                                | 1=Not at all<br>2=A little bit<br>3=Some<br>4=Quite a bit<br>5=Very much                                                                            | Newly developed                    |
| Credibility                   | <u>The messages</u> in the book were <u>credible</u> .                                                                                                         | 1=Strongly disagree<br>2=Somewhat disagree<br>3=Neither agree nor disagree<br>4=Somewhat agree<br>5=Strongly agree                                  | Adapted from (Moodie et al., 2010) |
| Understandability             | <u>The messages</u> in the book were <u>understandable</u> .                                                                                                   | 1=Strongly disagree<br>2=Somewhat disagree<br>3=Neither agree nor disagree<br>4=Somewhat agree<br>5=Strongly agree                                  | Adapted from (Moodie et al., 2010) |
| Intentions to read            | [page break]<br>Imagine you had your own copy of this book. How likely would you be to read this book to your child with initials [initials] in the next week? | [format as slider]<br>1=Not at all likely<br>...<br>7=Very likely                                                                                   | Newly developed                    |
| Frequency of intended reading | Imagine you had your own copy of this book. How often would you read this book to [initials]?                                                                  | [display vertically]<br>0=Never or less than 1 time per week<br>1=1-2 times per week<br>3=3-4 times per week<br>5=5-6 times per week<br>7=Every day | Newly developed                    |
| Child satisfaction            | Imagine you had your own copy of this book. How much would [initials] like this book?                                                                          | 1=Not at all<br>2=A little bit<br>3=Some<br>4=Quite a bit<br>5=Very much                                                                            | Newly developed                    |
| Likes                         | What did you like about this book?                                                                                                                             | [Open-ended text]                                                                                                                                   | Newly developed                    |
| Dislikes                      | What did you dislike about this book?                                                                                                                          | [Open-ended text]                                                                                                                                   | Newly developed                    |
| <b>Healthfulness</b>          |                                                                                                                                                                |                                                                                                                                                     |                                    |

**Appendix**  
**Storybooks About Healthy Beverage Consumption: Effects in an Online Randomized Experiment With Parents**  
**Grummon et al.**

|                                   |                                                                                                                                                                                                       |                                                   |                                                              |
|-----------------------------------|-------------------------------------------------------------------------------------------------------------------------------------------------------------------------------------------------------|---------------------------------------------------|--------------------------------------------------------------|
| Prompt                            | The next questions are about different types of beverages.<br><br>For each beverage, say how unhealthy or healthy it is for <u>your child</u> with initials {initials} to drink that beverage.        |                                                   |                                                              |
| Healthfulness                     | Soda or soft drinks (not diet)                                                                                                                                                                        | 1= Unhealthy<br>...<br>7 = Healthy                | Adapted from (Bollard et al., 2016)                          |
|                                   | Juice and juice pouches                                                                                                                                                                               | 1= Unhealthy<br>...<br>7 = Healthy                | Adapted from (Bollard et al., 2016)                          |
|                                   | Punch and other fruit-flavored drinks                                                                                                                                                                 | 1= Unhealthy<br>...<br>7 = Healthy                | Adapted from (Bollard et al., 2016)                          |
|                                   | Plain water                                                                                                                                                                                           | 1= Unhealthy<br>...<br>7 = Healthy                | Adapted from (Bollard et al., 2016)                          |
| <b>SSB Outcome Expectations</b>   |                                                                                                                                                                                                       |                                                   |                                                              |
| Prompt                            | <b>The next statements are about your child with initials [initials] drinking soda, juice, juice pouches, and punch.</b><br><br>My child drinking soda, juice, juice pouches, or punch often would... |                                                   |                                                              |
| SSB Negative outcome expectations | Lead my child to gain weight                                                                                                                                                                          | 1= Strongly disagree<br>...<br>7 = Strongly agree | Adapted from (Roberto et al., 2016; VanEpps & Roberto, 2016) |
|                                   | Increase my child's risk of dental cavities                                                                                                                                                           | 1= Strongly disagree<br>...<br>7 = Strongly agree | Adapted from (Roberto et al., 2016; VanEpps & Roberto, 2016) |
| SSB Positive outcome expectations | Help my child live a healthier life                                                                                                                                                                   | 1= Strongly disagree<br>...<br>7 = Strongly agree | Adapted from (Roberto et al., 2016; VanEpps & Roberto, 2016) |



**Appendix**  
**Storybooks About Healthy Beverage Consumption: Effects in an Online Randomized Experiment With Parents**  
**Grummon et al.**

|                                     |                                                                                                                                                                  |                                                   |                                                              |
|-------------------------------------|------------------------------------------------------------------------------------------------------------------------------------------------------------------|---------------------------------------------------|--------------------------------------------------------------|
|                                     | Help my child grow                                                                                                                                               | 1= Strongly disagree<br>...<br>7 = Strongly agree | Adapted from (Roberto et al., 2016; VanEpps & Roberto, 2016) |
|                                     | Keep my child from being thirsty                                                                                                                                 | 1= Strongly disagree<br>...<br>7 = Strongly agree | Adapted from (Roberto et al., 2016; VanEpps & Roberto, 2016) |
| <b>Water Outcome Expectations</b>   |                                                                                                                                                                  |                                                   |                                                              |
| Prompt                              | <b>The next statements are about your child with initials [initials] drinking <u>plain water</u>.</b><br><br>My child drinking <u>plain water</u> often would... |                                                   |                                                              |
| Water Negative outcome expectations | Lead my child to gain weight                                                                                                                                     | 1= Strongly disagree<br>...<br>7 = Strongly agree | Adapted from (Roberto et al., 2016; VanEpps & Roberto, 2016) |
|                                     | Increase my child's risk of dental cavities                                                                                                                      | 1= Strongly disagree<br>...<br>7 = Strongly agree | Adapted from (Grummon, Taillie, et al., 2019)                |
| Water Positive outcome expectations | Help my child live a healthier life                                                                                                                              | 1= Strongly disagree<br>...<br>7 = Strongly agree | Adapted from (Roberto et al., 2016; VanEpps & Roberto, 2016) |
|                                     | Help my child grow                                                                                                                                               | 1= Strongly disagree<br>...<br>7 = Strongly agree | Adapted from (Roberto et al., 2016; VanEpps & Roberto, 2016) |
|                                     | Keep my child from being thirsty                                                                                                                                 | 1= Strongly disagree<br>...<br>7 = Strongly agree | Adapted from (Roberto et al., 2016; VanEpps & Roberto, 2016) |
| <b>Norms</b>                        |                                                                                                                                                                  |                                                   |                                                              |
| Prompt                              | <b>The next statements are about <u>not</u> serving your child <u>soda, juice, juice pouches, or punch.</u></b>                                                  |                                                   |                                                              |

**Appendix**  
**Storybooks About Healthy Beverage Consumption: Effects in an Online Randomized Experiment With Parents**  
**Grummon et al.**

|                         | <b>Say how much you disagree or agree with each statement.</b>                                                                           |                                                                                                                              |                                      |
|-------------------------|------------------------------------------------------------------------------------------------------------------------------------------|------------------------------------------------------------------------------------------------------------------------------|--------------------------------------|
| Injunctive norms- SSBs  | People who are important to me <b>think I should not serve</b> my child soda, juice, juice pouches, or punch.                            | 1 = Strongly disagree<br>2 = Somewhat disagree<br>3 = Neither agree nor disagree<br>4 = Somewhat agree<br>5 = Strongly agree | Adapted from (Zoellner et al., 2012) |
|                         | People who are important to me <b>would approve of me not serving</b> my child soda, juice, juice pouches, or punch.                     | 1 = Strongly disagree<br>2 = Somewhat disagree<br>3 = Neither agree nor disagree<br>4 = Somewhat agree<br>5 = Strongly agree | Adapted from (Zoellner et al., 2012) |
|                         | People who are important to me <b>want me to not serve</b> my child soda, juice, juice pouches, or punch.                                | 1 = Strongly disagree<br>2 = Somewhat disagree<br>3 = Neither agree nor disagree<br>4 = Somewhat agree<br>5 = Strongly agree | Adapted from (Zoellner et al., 2012) |
| Prompt                  | <b>The next statements are about serving your child <u>more</u> plain water. Say how much you disagree or agree with each statement.</b> |                                                                                                                              |                                      |
| Injunctive norms- Water | People who are important to me <b>think I should serve</b> my child more plain water.                                                    | 1 = Strongly disagree<br>2 = Somewhat disagree<br>3 = Neither agree nor disagree<br>4 = Somewhat agree<br>5 = Strongly agree | Adapted from (Zoellner et al., 2012) |
|                         | People who are important to me <b>would approve of me serving</b> my child more plain water.                                             | 1 = Strongly disagree<br>2 = Somewhat disagree<br>3 = Neither agree nor disagree<br>4 = Somewhat agree<br>5 = Strongly agree | Adapted from (Zoellner et al., 2012) |
|                         | People who are important to me <b>want me to serve</b> my child more plain water.                                                        | 1 = Strongly disagree<br>2 = Somewhat disagree                                                                               | Adapted from (Zoellner et al., 2012) |

**Appendix**  
**Storybooks About Healthy Beverage Consumption: Effects in an Online Randomized Experiment With Parents**  
**Grummon et al.**

|                                                             |                                                                                                                                                                                                                                                                                                                                                                                                                                                                                                                                                                           |                                                                            |                                                                            |
|-------------------------------------------------------------|---------------------------------------------------------------------------------------------------------------------------------------------------------------------------------------------------------------------------------------------------------------------------------------------------------------------------------------------------------------------------------------------------------------------------------------------------------------------------------------------------------------------------------------------------------------------------|----------------------------------------------------------------------------|----------------------------------------------------------------------------|
|                                                             |                                                                                                                                                                                                                                                                                                                                                                                                                                                                                                                                                                           | 3 = Neither agree nor disagree<br>4 = Somewhat agree<br>5 = Strongly agree |                                                                            |
| <b>Intentions to Limit Sugary Drinks and Increase Water</b> |                                                                                                                                                                                                                                                                                                                                                                                                                                                                                                                                                                           |                                                                            |                                                                            |
| Prompt                                                      | <p>The next statements are about the next week (7 days).</p> <p>For each beverage, tell us how likely you are to <b>limit</b> how often you serve your child with initials [initials] that beverage in the next week. By <b>limit</b>, we mean either:</p> <p>1) If you serve your child that beverage, reducing how often you serve your child that beverage</p> <p>or</p> <p>2) If you do not serve your child that beverage, continuing to not serve that beverage.</p> <p>In the next week, how likely are you to <b>limit</b> how often you serve your child....</p> |                                                                            | Adapted from (Conner & Sparks, 1995), and (Grummon, Taillie, et al., 2019) |
| Intentions to limit                                         | Soda?                                                                                                                                                                                                                                                                                                                                                                                                                                                                                                                                                                     | 1=Not at all likely<br>...<br>7=Very likely                                |                                                                            |
|                                                             | Juice or juice pouches?                                                                                                                                                                                                                                                                                                                                                                                                                                                                                                                                                   | 1=Not at all likely<br>...<br>7=Very likely                                |                                                                            |
|                                                             | Punch or fruit-flavored drinks?                                                                                                                                                                                                                                                                                                                                                                                                                                                                                                                                           | 1=Not at all likely<br>...<br>7=Very likely                                |                                                                            |
| Water intentions prompt                                     | The next question is also about the next week (7 days). Now we are interested in how likely you are to <b>increase</b> how often you serve your child with initials [initials] <b>plain water</b> .                                                                                                                                                                                                                                                                                                                                                                       |                                                                            |                                                                            |

**Appendix**  
**Storybooks About Healthy Beverage Consumption: Effects in an Online Randomized Experiment With Parents**  
**Grummon et al.**

|                                      |                                                                                                                                      |                                                                                    |                                                                            |
|--------------------------------------|--------------------------------------------------------------------------------------------------------------------------------------|------------------------------------------------------------------------------------|----------------------------------------------------------------------------|
|                                      |                                                                                                                                      |                                                                                    |                                                                            |
| Intentions to increase water         | In the next week, how likely are you to <b>increase</b> how often you serve your child with [initials] <b>plain water</b> ?          | 1=Not at all likely<br>...<br>7=Very likely                                        | Adapted from (Conner & Sparks, 1995), and (Grummon, Taillie, et al., 2019) |
| <b>Reading Beliefs and Practices</b> |                                                                                                                                      |                                                                                    |                                                                            |
| Prompt                               | The next questions ask about your reading practices with your child with initials {Initials}. Tell us how often the following occur. |                                                                                    |                                                                            |
| Participation                        | When we read, I ask my child a lot of questions.                                                                                     | 1=Never<br>2=Sometimes<br>3=Often<br>4=Always                                      | (DeBaryshe & Binder, 1994)                                                 |
|                                      | When we read, we talk about the pictures as much as we read the words.                                                               | 1=Never<br>2=Sometimes<br>3=Often<br>4=Always                                      | Adapted from (DeBaryshe & Binder, 1994)                                    |
|                                      | When we read, I have my child point out different letters or numbers that are printed in the book.                                   | 1=Never<br>2=Sometimes<br>3=Often<br>4=Always                                      | (DeBaryshe & Binder, 1994)                                                 |
|                                      | I try to make the story more real to my child by relating the story to his or her life.                                              | 1=Never<br>2=Sometimes<br>3=Often<br>4=Always                                      | (DeBaryshe & Binder, 1994)                                                 |
| Prompt                               | <b>[page break]</b><br><br><b>Say how much you agree or disagree with the next statements.</b>                                       |                                                                                    |                                                                            |
| Participation                        | When we read, I want my child to help me tell the story.                                                                             | 1=Strongly disagree<br>2=Somewhat disagree<br>3=Somewhat agree<br>4=Strongly agree | (DeBaryshe & Binder, 1994)                                                 |
|                                      | When we read, I want my child to ask questions about the book.                                                                       | 1=Strongly disagree<br>2=Somewhat disagree<br>3=Somewhat agree<br>4=Strongly agree | (DeBaryshe & Binder, 1994)                                                 |
| Resources                            | Even if I would like to, I'm just too busy to read to my child.                                                                      | 1=Strongly disagree<br>2=Somewhat disagree<br>3=Somewhat agree                     | (DeBaryshe & Binder, 1994)                                                 |



**Appendix**  
**Storybooks About Healthy Beverage Consumption: Effects in an Online Randomized Experiment With Parents**  
**Grummon et al.**

|                    |                                                                                        |                                                                                    |                             |
|--------------------|----------------------------------------------------------------------------------------|------------------------------------------------------------------------------------|-----------------------------|
|                    |                                                                                        | 4=Strongly agree                                                                   |                             |
|                    | My child owns or has access to very few books.                                         | 1=Strongly disagree<br>2=Somewhat disagree<br>3=Somewhat agree<br>4=Strongly agree | (DeBaryshe & Binder, 1994)  |
|                    | There is no quiet place in the house to read to my child.                              | 1=Strongly disagree<br>2=Somewhat disagree<br>3=Somewhat agree<br>4=Strongly agree | (DeBaryshe & Binder, 1994)  |
|                    | I have other things to do as a parent that get in the way of me reading to my child.   | 1=Strongly disagree<br>2=Somewhat disagree<br>3=Somewhat agree<br>4=Strongly agree | (DeBaryshe & Binder, 1994)  |
|                    | I do not have time to read to my child.                                                | 1=Strongly disagree<br>2=Somewhat disagree<br>3=Somewhat agree<br>4=Strongly agree | Newly developed             |
|                    | My child does not have time to sit down and read with me.                              | 1=Strongly disagree<br>2=Somewhat disagree<br>3=Somewhat agree<br>4=Strongly agree | Newly developed             |
| Prompt             | <b>Say how much you disagree or agree with the next statements.</b>                    |                                                                                    |                             |
| Efficacy           | As a parent, I play an important role in my child's reading.                           | 1=Strongly disagree<br>2=Somewhat disagree<br>3=Somewhat agree<br>4=Strongly agree | Newly developed             |
|                    | I would like to read with my child, but I do not know where to find books.             | 1=Strongly disagree<br>2=Somewhat disagree<br>3=Somewhat agree<br>4=Strongly agree | Newly developed             |
|                    | I would like to read with my child, but I do not know <u>when</u> to do it.            | 1=Strongly disagree<br>2=Somewhat disagree<br>3=Somewhat agree<br>4=Strongly agree | Newly developed             |
|                    | I would like to read with my child, but I do not know <u>where</u> to do it.           | 1=Strongly disagree<br>2=Somewhat disagree<br>3=Somewhat agree<br>4=Strongly agree | Newly developed             |
|                    | I do not read to my child because I do not know how to encourage her/him to sit still. | 1=Strongly disagree<br>2=Somewhat disagree<br>3=Somewhat agree<br>4=Strongly agree | Newly developed             |
| Reading confidence | I am confident in my ability to read stories with my child.                            | 1=Strongly disagree<br>2=Somewhat disagree<br>3=Somewhat agree                     | Adapted from (Formby, 2014) |

**Appendix**  
**Storybooks About Healthy Beverage Consumption: Effects in an Online Randomized Experiment With Parents**  
**Grummon et al.**

|                  |                                                                                                                                                                                                            |                                                                                                                             |                            |
|------------------|------------------------------------------------------------------------------------------------------------------------------------------------------------------------------------------------------------|-----------------------------------------------------------------------------------------------------------------------------|----------------------------|
|                  |                                                                                                                                                                                                            | 4=Strongly agree                                                                                                            |                            |
| Knowledge        | My child knows the names of many things she/he has seen in books.                                                                                                                                          | 1=Strongly disagree<br>2=Somewhat disagree<br>3=Somewhat agree<br>4=Strongly agree                                          | (DeBaryshe & Binder, 1994) |
|                  | My child learns lessons and morals from the stories we read.                                                                                                                                               | 1=Strongly disagree<br>2=Somewhat disagree<br>3=Somewhat agree<br>4=Strongly agree                                          | (DeBaryshe & Binder, 1994) |
|                  | Reading helps children learn about things they never see in real life (like dinosaurs).                                                                                                                    | 1=Strongly disagree<br>2=Somewhat disagree<br>3=Somewhat agree<br>4=Strongly agree                                          | (DeBaryshe & Binder, 1994) |
|                  | My child learns important life skills from books (like how to follow a recipe).                                                                                                                            | 1=Strongly disagree<br>2=Somewhat disagree<br>3=Somewhat agree<br>4=Strongly agree                                          | (DeBaryshe & Binder, 1994) |
| Books as tools   | My child can learn healthy habits from books (like brushing her/his teeth).                                                                                                                                | 1=Strongly disagree<br>2=Somewhat disagree<br>3=Somewhat agree<br>4=Strongly agree                                          | Newly developed            |
|                  | My child copies behaviors she/he learns about in books (like sharing).                                                                                                                                     | 1=Strongly disagree<br>2=Somewhat disagree<br>3=Somewhat agree<br>4=Strongly agree                                          | Newly developed            |
| Prompt           | <b>The next questions are also about your reading practices with your child with initials {initials}.</b>                                                                                                  |                                                                                                                             |                            |
| Frequency        | During a typical week, how often do you read to this child?                                                                                                                                                | 0=Never or less than 1 time per week<br>1=1-2 times per week<br>3=3-4 times per week<br>5=5-6 times per week<br>7=Every day | Newly developed            |
| Amount           | When you read to this child, how long do you usually spend reading?<br>Enter the number of minutes you usually spend reading in the box. If you don't read to this child, enter the number "0" in the box. | [Allow only numerical answers, with minimum of 0 and maximum of 480 (8 hours)]                                              | Newly developed            |
| Other caregivers | During a typical week, how often do other adult caregivers (for                                                                                                                                            | 0=Never or less than 1 time per week<br>1=1-2 times per week                                                                | Newly developed            |

**Appendix**  
**Storybooks About Healthy Beverage Consumption: Effects in an Online Randomized Experiment With Parents**  
**Grummon et al.**

|                                            |                                                                                            |                                                                                                                                                                                                                                                                                                                                |                                                                                                                                                              |
|--------------------------------------------|--------------------------------------------------------------------------------------------|--------------------------------------------------------------------------------------------------------------------------------------------------------------------------------------------------------------------------------------------------------------------------------------------------------------------------------|--------------------------------------------------------------------------------------------------------------------------------------------------------------|
| frequency of reading to child              | example, another parent or a grandparent) read to this child?                              | 3=3-4 times per week<br>5=5-6 times per week<br>7=Every day                                                                                                                                                                                                                                                                    |                                                                                                                                                              |
| <b>Demographics &amp; Health Behaviors</b> |                                                                                            |                                                                                                                                                                                                                                                                                                                                |                                                                                                                                                              |
| Prompt                                     | <b>The next questions are about you and your household.</b>                                |                                                                                                                                                                                                                                                                                                                                |                                                                                                                                                              |
| Caregiver relationship to child            | What is your relationship to the child with initials [initials]?                           | 1=Parent<br>2=Grandparent<br>3=Aunt/Uncle<br>4=Other legal guardian<br>5= Other: _____                                                                                                                                                                                                                                         | NA                                                                                                                                                           |
| Source of drinking water                   | Where do you usually get your water for drinking?                                          | [Randomize order of responses 1-3]<br>1=Unfiltered tap water<br>2=Filtered tap water<br>3=Bottled water<br>4=Somewhere else: _____                                                                                                                                                                                             | American Housing Survey, US Census Bureau<br><a href="https://www.census.gov/programs-surveys/ahs.html">https://www.census.gov/programs-surveys/ahs.html</a> |
| Perceptions of local tap water             | Rate your agreement with the following statement: My local tap water is safe to drink.     | 1=Strongly disagree<br>2=Somewhat disagree<br>3=Neither disagree nor agree<br>4=Somewhat agree<br>5=Strongly agree                                                                                                                                                                                                             | Health Styles survey, as cited in (Onufrak et al., 2012)                                                                                                     |
| Financial situation                        | How would you describe your household's financial situation right now? Would you say that: | 1 = You are having difficulty paying the bills, no matter what you do<br>2 = You have money to pay the bills, but only because you have cut back on things<br>3 = You have enough money to pay the bills, but little spare money to buy extra or special things<br>4 = After paying the bills, you still have enough money for | (DeFrank et al., 2009)                                                                                                                                       |

**Appendix**  
**Storybooks About Healthy Beverage Consumption: Effects in an Online Randomized Experiment With Parents**  
**Grummon et al.**

|                                                        |                                                                                                                                                                                         |                                                                                                                                                                                                                                                                            |                                                            |
|--------------------------------------------------------|-----------------------------------------------------------------------------------------------------------------------------------------------------------------------------------------|----------------------------------------------------------------------------------------------------------------------------------------------------------------------------------------------------------------------------------------------------------------------------|------------------------------------------------------------|
|                                                        |                                                                                                                                                                                         | special things that you want                                                                                                                                                                                                                                               |                                                            |
| Annual household income                                | Which of the following categories best describes your total household income in the last 12 months? It's fine to make your best guess.                                                  | 1= Less than \$10,000<br>2= \$10,000 to \$14,999<br>3= \$15,000 to \$24,999<br>4= \$25,000 to \$34,999<br>5= \$35,000 to \$49,999<br>6= \$50,000 to \$74,999<br>7= \$75,000 to \$99,999<br>8= \$100,000 to \$149,999<br>9= \$150,000 to \$199,999<br>10= \$200,000 or more | Population Assessment of Tobacco and Health Study (2014)   |
| Number of household members who depends on this income | How many people depend on this income, including you?                                                                                                                                   | # of people [restricted to 1-20]                                                                                                                                                                                                                                           | USDHHS 2016                                                |
| Number of children                                     | How many children under the age of 18 live in your household?                                                                                                                           | # of children [restricted to 0-20]                                                                                                                                                                                                                                         | NA                                                         |
| Marital status                                         | What is your current marital status?                                                                                                                                                    | 1=Single, never married<br>2=Married or living with a partner<br>3=Widowed<br>4=Divorced<br>5=Separated                                                                                                                                                                    | Adapted from US Census 2010                                |
| SNAP                                                   | In the last 12 months, did you or any member of your household receive Supplemental Nutrition Assistance Program (SNAP) benefits? These benefits are sometimes also called Food Stamps. | 0=No<br>1=Yes                                                                                                                                                                                                                                                              | National Health and Nutrition Examination Surveys (NHANES) |
| WIC                                                    | In the last 12 months, did you or any member of your household receive benefits from the Women, Infants, and Children (WIC) program?                                                    | 0=No<br>1=Yes                                                                                                                                                                                                                                                              | Adapted from NHANES                                        |



**Appendix**  
**Storybooks About Healthy Beverage Consumption: Effects in an Online Randomized Experiment With Parents**  
**Grummon et al.**

|                                   |                                                         |                                                                                                                                                                                                                                                   |             |
|-----------------------------------|---------------------------------------------------------|---------------------------------------------------------------------------------------------------------------------------------------------------------------------------------------------------------------------------------------------------|-------------|
| Education                         | What is the highest level of school you have completed? | 1=Less than high school or U.S. high school equivalent (GED)<br>2=High school diploma or U.S. high school equivalent (GED)<br>3=Some college<br>4=2-year college degree<br>5=4-year college degree<br>6=Master's degree, graduate degree, or more |             |
| Race of participant               | What is your race? Please check all that apply.         | [Select all that apply]<br>1=White<br>2=Black or African American<br>3=American Indian or Alaska Native<br>4=Asian<br>5=Pacific Islander<br>6=Another race:                                                                                       | NA          |
| Hispanic ethnicity of participant | Are you of Hispanic, Latino, or Spanish origin?         | 0 = No<br>1= Yes                                                                                                                                                                                                                                  | 2010 Census |
| Age of parent/caregiver           | What is your age?                                       | _____                                                                                                                                                                                                                                             | NA          |
| Parent/caregiver gender           | What is your gender?                                    | 1=Man<br>2=Woman<br>3=Transgender<br>4=Nonbinary<br>5=Another option not listed: [Text box]                                                                                                                                                       | NA          |
| Final                             | Anything else you want to tell us?                      | Open-ended text                                                                                                                                                                                                                                   |             |

**Appendix**  
**Storybooks About Healthy Beverage Consumption: Effects in an Online Randomized Experiment With Parents**  
**Grummon et al.**

**Appendix Figure 1.** CONSORT flow diagram.

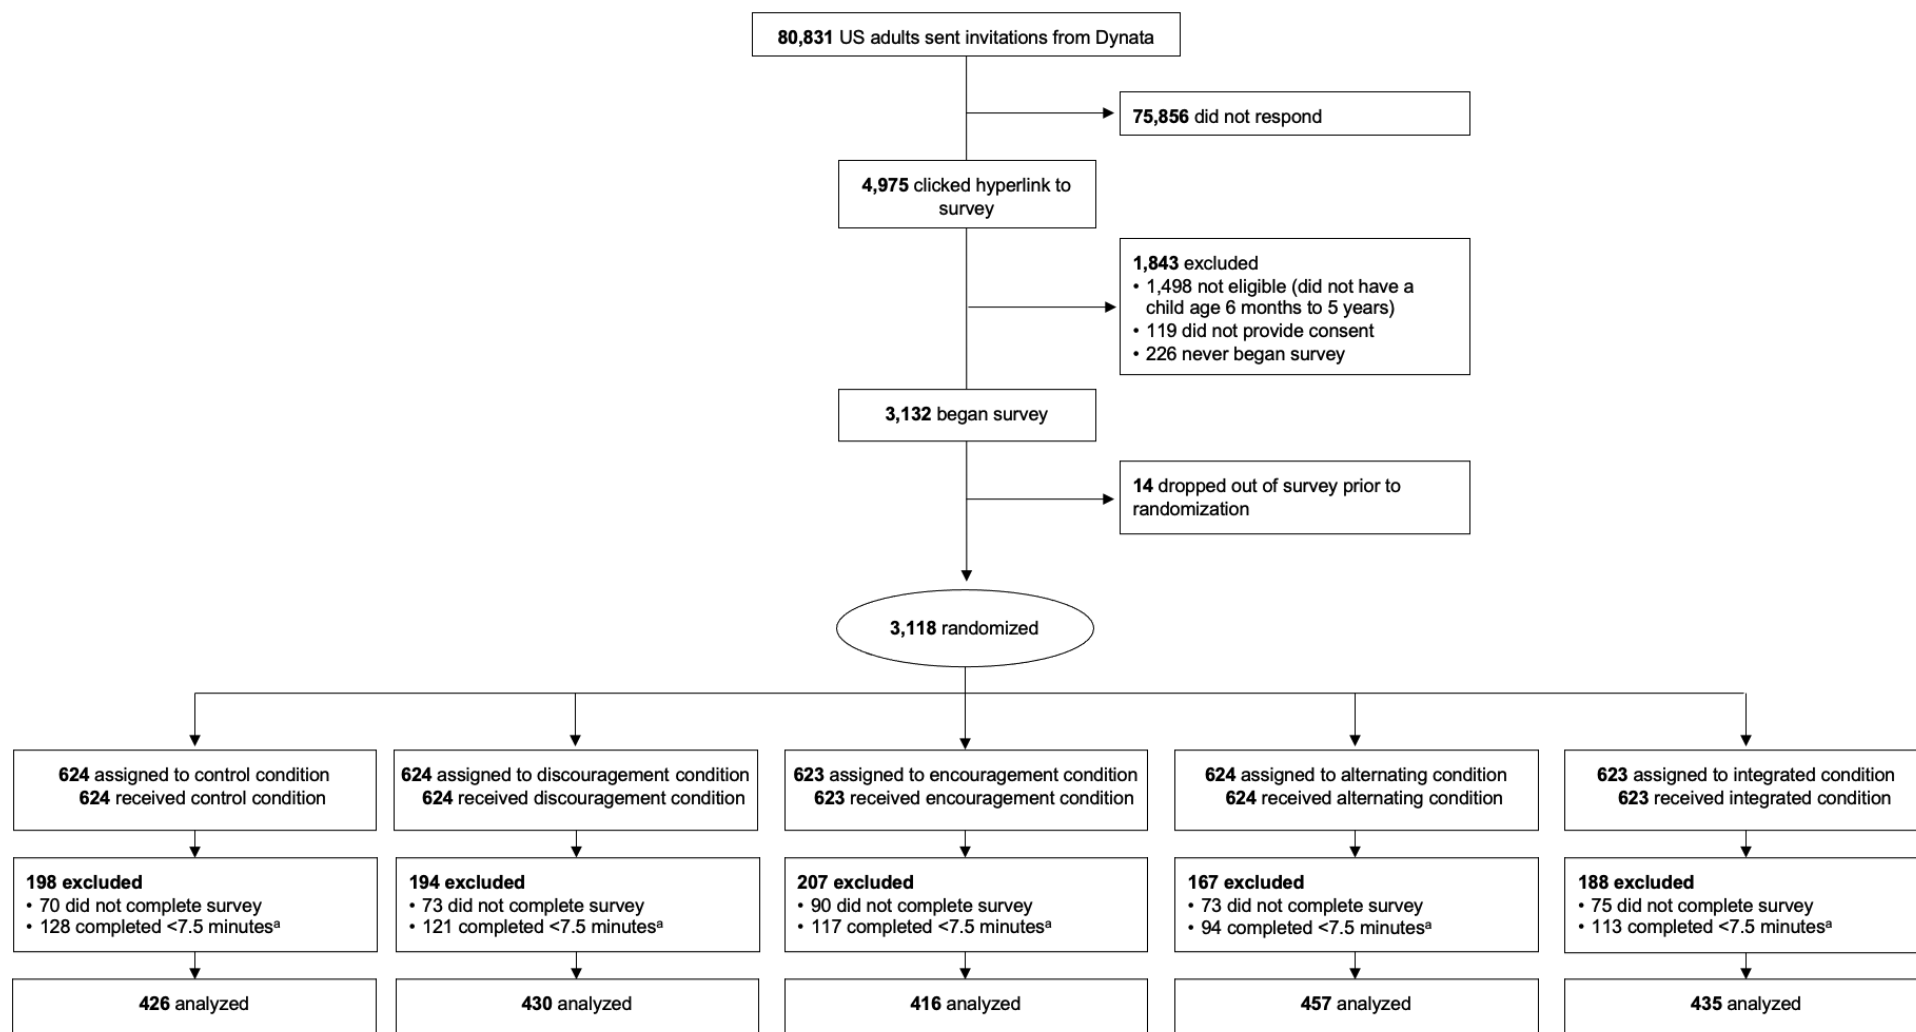

**Appendix Table 1.** Interaction of experimental group and participant characteristics in predicting perceived discouragement from serving one's child sugary drinks,  $n=2,164$  parents of children ages 6 months to 5 years

| Characteristic                                     | Impact of beverage messages <sup>a</sup> | $p$ for interaction <sup>b</sup> |
|----------------------------------------------------|------------------------------------------|----------------------------------|
| <b>Child age</b>                                   |                                          |                                  |
| 6–11 months                                        | 0.10                                     | <b>0.005</b>                     |
| 12–23 months                                       | 0.72                                     |                                  |
| 2 years                                            | 0.70                                     |                                  |
| 3 years                                            | 0.53                                     |                                  |
| 4 years                                            | 0.59                                     |                                  |
| 5 years                                            | 0.73                                     |                                  |
| <b>Frequency of serving water to child</b>         |                                          |                                  |
| Never or less than 1 time per week                 | 0.10                                     | <b>&lt;0.001</b>                 |
| 1–6 times per week                                 | 0.22                                     |                                  |
| 1– <2 times per day                                | 0.38                                     |                                  |
| ≥2 times a day                                     | 0.90                                     |                                  |
| <b>Frequency of serving sugary drinks to child</b> |                                          |                                  |
| Never or less than 1 time per week                 | 0.65                                     | 0.395                            |
| 1–6 times per week                                 | 0.68                                     |                                  |
| 1– <2 times per day                                | 0.51                                     |                                  |
| ≥2 times a day                                     | 0.48                                     |                                  |
| <b>Educational attainment</b>                      |                                          |                                  |
| Some college or less                               | 0.66                                     | 0.169                            |
| College degree or more                             | 0.51                                     |                                  |
| <b>Race</b>                                        |                                          |                                  |
| White                                              | 0.58                                     | 0.871                            |
| Black or African American                          | 0.59                                     |                                  |
| American Indian or Alaska Native                   | 0.39                                     |                                  |
| Asian or Pacific Islander                          | 0.32                                     |                                  |
| Other/multiracial <sup>c</sup>                     | 0.58                                     |                                  |
| <b>Ethnicity</b>                                   |                                          |                                  |
| Not Latino(a)                                      | 0.54                                     | 0.539                            |
| Latino(a)                                          | 0.61                                     |                                  |
| <b>Survey Language</b>                             |                                          |                                  |
| English                                            | 0.60                                     | 0.076                            |
| Spanish                                            | 0.30                                     |                                  |
| <b>Enrolled in SNAP or WIC</b>                     |                                          |                                  |
| Not enrolled in either                             | 0.77                                     | <b>&lt;0.001</b>                 |
| Enrolled in at least 1                             | 0.40                                     |                                  |
| <b>Household income, annual</b>                    |                                          |                                  |
| <\$50,000                                          | 0.52                                     | 0.281                            |
| ≥\$50,000                                          | 0.63                                     |                                  |

Notes: Boldface indicates statistical significance,  $p<0.05$ .

**Appendix**  
**Storybooks About Healthy Beverage Consumption: Effects in an Online Randomized Experiment With Parents**  
**Grummon et al.**

<sup>a</sup>Difference in predicted means between participants who randomized to any beverage message condition and participants randomized to the control condition. The outcome variable, perceived discouragement from serving one's child sugary drinks, was standardized prior to analysis; impacts can be interpreted in units of standard deviations of the outcome.

<sup>b</sup>*p* for interaction is from *t*-tests (for moderators with 2 levels) or Wald tests (for moderators with more than 2 levels) examining the joint significance of the coefficients on all interaction terms.

<sup>c</sup>Includes participants who marked "other race" or who marked multiple races.

SNAP, Supplemental Nutrition Assistance Program; WIC, Special Supplemental Nutrition Assistance Program for Women, Infants, and Children.

**Appendix Table 2.** Interaction of Experimental Group and Participant Characteristics in Predicting Perceived Encouragement for Serving One’s Child More Water,  $n=2,164$  Parents of Children Ages 6 Months to 5 Years

| Characteristic                              | Impact of beverage messages <sup>a</sup> | <i>p</i> for interaction <sup>b</sup> |
|---------------------------------------------|------------------------------------------|---------------------------------------|
| Child age                                   |                                          |                                       |
| 6–11 months                                 | 0.34                                     | 0.163                                 |
| 12–23 months                                | 0.48                                     |                                       |
| 2 years                                     | 0.80                                     |                                       |
| 3 years                                     | 0.58                                     |                                       |
| 4 years                                     | 0.62                                     |                                       |
| 5 years                                     | 0.68                                     |                                       |
| Frequency of serving water to child         |                                          |                                       |
| Never or less than <1 time per week         | 0.05                                     | <b>&lt;0.001</b>                      |
| 1–6 times per week                          | 0.25                                     |                                       |
| 1– <2 times per day                         | 0.68                                     |                                       |
| ≥2 times a day                              | 0.90                                     |                                       |
| Frequency of serving sugary drinks to child |                                          |                                       |
| Never or <1 time per week                   | 0.65                                     | 0.355                                 |
| 1–6 times per week                          | 0.69                                     |                                       |
| 1– <2 times per day                         | 0.63                                     |                                       |
| ≥2 times a day                              | 0.47                                     |                                       |
| Educational attainment                      |                                          |                                       |
| Some college or less                        | 0.64                                     | 0.575                                 |
| College degree or more                      | 0.58                                     |                                       |
| Race                                        |                                          |                                       |
| White                                       | 0.58                                     | 0.916                                 |
| Black or African American                   | 0.61                                     |                                       |
| American Indian or Alaska Native            | 0.61                                     |                                       |
| Asian or Pacific Islander                   | 0.35                                     |                                       |
| Other/multiracial <sup>c</sup>              | 0.65                                     |                                       |
| Ethnicity                                   |                                          |                                       |
| Not Latino(a)                               | 0.61                                     | 0.926                                 |
| Latino(a)                                   | 0.60                                     |                                       |
| Survey language                             |                                          |                                       |
| English                                     | 0.63                                     | 0.071                                 |
| Spanish                                     | 0.33                                     |                                       |
| Enrolled in SNAP or WIC                     |                                          |                                       |
| Not enrolled in either                      | 0.74                                     | <b>0.021</b>                          |
| Enrolled in at least 1                      | 0.50                                     |                                       |
| Household income, annual                    |                                          |                                       |
| <\$50,000                                   | 0.57                                     | 0.465                                 |
| ≥\$50,000                                   | 0.64                                     |                                       |

Notes: Boldface indicates statistical significance,  $p<0.05$ .



**Appendix**  
**Storybooks About Healthy Beverage Consumption: Effects in an Online Randomized Experiment With Parents**  
**Grummon et al.**

<sup>a</sup>Difference in predicted means between participants who randomized to any beverage message condition and participants randomized to the control condition. The outcome variable, perceived discouragement from serving one's child sugary drinks, was standardized prior to analysis; impacts can be interpreted in units of standard deviations of the outcome.

<sup>b</sup>*p* for interaction is from *t*-tests (for moderators with 2 levels) or Wald tests (for moderators with more than 2 levels) examining the joint significance of the coefficients on all interaction terms.

<sup>c</sup>Includes participants who marked "other race" or who marked multiple races.

SNAP, Supplemental Nutrition Assistance Program; WIC, Special Supplemental Nutrition Assistance Program for Women, Infants, and Children.

**Appendix**  
**Storybooks About Healthy Beverage Consumption: Effects in an Online Randomized Experiment With Parents**  
**Grummon et al.**

**Appendix Table 3.** Impact of Sugary Drink Discouragement, Water Encouragement, and Combined Discouragement and Encouragement Messages on Other Outcomes,  $n=2,164$  Parents of Children Ages 6 Months to 5 Years

| Message topic                             | Positive emotions        | Perceptions that sugary drinks are unhealthy | Perceptions that water is healthy | Social norms to limit serving sugary drinks | Social norms to increase serving water | Expectations sugary drinks lead to negative outcomes | Expectations water leads to positive outcomes |
|-------------------------------------------|--------------------------|----------------------------------------------|-----------------------------------|---------------------------------------------|----------------------------------------|------------------------------------------------------|-----------------------------------------------|
| B                                         | B                        | B                                            | B                                 | B                                           | B                                      | B                                                    | B                                             |
| Sugary drink discouragement               | -0.07 <sup>B</sup>       | <b>0.24</b> <sup>AB</sup>                    | -0.03 <sup>A</sup>                | -0.02 <sup>A</sup>                          | -0.03 <sup>A</sup>                     | 0.12 <sup>A</sup>                                    | 0.07 <sup>A</sup>                             |
| Water encouragement                       | 0.11 <sup>A</sup>        | <b>0.18</b> <sup>A</sup>                     | 0.05 <sup>A</sup>                 | 0.03 <sup>A</sup>                           | 0.09 <sup>A</sup>                      | 0.08 <sup>A</sup>                                    | <b>0.15</b> <sup>A</sup>                      |
| Combined discouragement and encouragement | <b>0.15</b> <sup>A</sup> | <b>0.31</b> <sup>B</sup>                     | 0.05 <sup>A</sup>                 | 0.04 <sup>A</sup>                           | 0.05 <sup>A</sup>                      | <b>0.18</b> <sup>A</sup>                             | <b>0.14</b> <sup>A</sup>                      |

*Notes:* Table shows unstandardized regression coefficients (Bs) for each message topic on other outcomes. Outcomes were standardized prior to analysis. Boldface indicates a statistically significant impact of the message topic compared to the control,  $p<0.05$ . Within each column, coefficients with different superscript letters are significantly different from one another in pairwise comparisons,  $p<0.05$ . For example, the effect on positive emotions of messages focused on discouragement of sugary drinks only (shown with superscript letter B) was significantly different than the effect of the encouragement only messages and the effect of the combined discouragement and encouragement messages; the latter 2 effects did not differ from one another (both shown with superscript letter A).

## **APPENDIX REFERENCES**

1. Baig SA, Noar SM, Gottfredson NC, Boynton MH, Ribisl KM, Brewer NT. UNC Perceived Message Effectiveness: validation of a brief scale. *Ann Behav Med*. 2019;53(8):732–742. <https://doi.org/10.1093/abm/kay080>.
2. Bollard T, Maubach N, Walker N, Mhurchu CN. Effects of plain packaging, warning labels, and taxes on young people’s predicted sugar-sweetened beverage preferences: an experimental study. *Int J Behav Nutr Phys Act*. 2016;13(1):95.
3. Brewer N, Parada Jr H, Hall M, Boynton M, Noar S, Ribisl K. Understanding why pictorial cigarette pack warnings increase quit attempts. *Ann Behav Med*. 2019;53(3):232–243. <https://doi.org/10.1093/abm/kay032>.
4. Conner M, Sparks P. The theory of planned behavior and health behaviors. In: *Predicting Health Behavior*. Open University Press; 1995:121–162.
5. DeBaryshe BD, Binder JC. Development of an instrument for measuring parental beliefs about reading aloud to young children. *Percept Mot Skills*. 1994;78(3\_suppl):1303–1311.
6. DeFrank JT, Rimer BK, Gierisch JM, Bowling JM, Farrell D, Skinner CS. Impact of mailed and automated telephone reminders on receipt of repeat mammograms: a randomized controlled trial. *Am J Prev Med*. 2009;36(6):459–467.
7. Fathelrahman AI, Omar M, Awang R, Cummings KM, Borland R, Samin ASBM. Impact of the new Malaysian cigarette pack warnings on smokers’ awareness of health risks and interest in quitting smoking. *Int J Environ Res Public Health*. 2010;7(11):4089–4099. <https://doi.org/10.3390/ijerph7114089>.

8. Formby S. Children's Early Literacy Practices at Home and in Early Years Settings: Second Annual Survey of Parents and Practitioners. National Literacy Trust; 2014.
9. Grummon AH, Hall MG, Taillie LS, Brewer NT. How should sugar-sweetened beverage health warnings be designed? A randomized experiment. *Prev Med*. 2019;121:158–166. <https://doi.org/10.1016/j.ypmed.2019.02.010>.
10. Grummon AH, Taillie LS, Golden SD, Hall MG, Ranney LM, Brewer NT. Sugar-sweetened beverage health warnings and purchases: a randomized controlled trial. *Am J Prev Med*. 2019;57(5):601–610. <https://doi.org/10.1016/j.amepre.2019.06.019>.
11. Hammond D, Fong GT, McDonald PW, Cameron R, Brown KS. Impact of the graphic Canadian warning labels on adult smoking behaviour. *Tob Control*. 2003;12(4):391–395.
12. Lora KR, Davy B, Hedrick V, Ferris AM, Anderson MP, Wakefield D. Assessing initial validity and reliability of a beverage intake questionnaire in Hispanic preschool-aged children. *J Acad Nutr Diet*. 2016;116(12):1951–1960.
13. Moodie C, MacKintosh AM, Hammond D. Adolescents' response to text-only tobacco health warnings: results from the 2008 UK Youth Tobacco Policy Survey. *Eur J Public Health*. 2010;20(4):463–469. <https://doi.org/10.1093/eurpub/ckp199>.
14. Onufrak SJ, Park S, Sharley JR, Sherry B. The relationship of perceptions of tap water safety with intake of sugar-sweetened beverages and plain water among U.S. adults. *Public Health Nutr*. 2012;26.
15. Roberto CA, Wong D, Musicus A, Hammond D. The influence of sugar-sweetened beverage health warning labels on parents' choices. *Pediatrics*. 2016;137(2):e20153185.

16. VanEpps EM, Roberto CA. The influence of sugar-sweetened beverage warnings: a randomized trial of adolescents' choices and beliefs. *Am J Prev Med.* 2016;51(5), 664–672. <https://doi.org/10.1016/j.amepre.2016.07.010>.
17. Zoellner J, Estabrooks PA, Davy BM, Chen Y-CY, You W. Exploring the Theory of Planned Behavior to explain sugar-sweetened beverage consumption. *J Nutr Ed Behav.* 2012;44(2), 172–177.
